# Supplementary material
Source: ML conference proceedings conference paper supplement (https://aclanthology.org/D19-1358)
Supplement: Attachment [file D19-1358.Attachment.zip]

Archive with 5 entries (2 files):
- EMNLP2019-supp/
- EMNLP2019-supp/EMNLP2019-supp.pdf
- __MACOSX/
- __MACOSX/EMNLP2019-supp/
- __MACOSX/EMNLP2019-supp/._EMNLP2019-supp.pdf
